# Supplementary material
Source: PubMed Central journal article supplement (PMC2882514)
Supplement: NIHMS183886-supplement-1.pdf [file NIHMS183886-supplement-1.pdf]

## Supplementary Data

**Table S1: Data collection and refinement statistics**

| Data collection                     | Apo                  | Zn                   |
|-------------------------------------|----------------------|----------------------|
| Space group                         | $P2_122_1$           | $P2_122_1$           |
| Cell dimensions                     |                      |                      |
| <i>a</i> , <i>b</i> , <i>c</i> (Å)  | 86.05, 92.42, 116.73 | 86.06, 91.85, 115.93 |
| $\alpha$ , $\beta$ , $\gamma$ (°)   | 90, 90, 90           | 90, 90, 90           |
| Resolution (Å)                      | 50 – 2.5             | 50 – 3.0             |
| $R_{\text{sym}}$                    | 5.4 (64.2)           | 10.2 (53.8)          |
| $I / \sigma I$                      | 34.5 (3.6)           | 10.6 (2.1)           |
| Completeness (%)                    | 100.0 (100.0)        | 91.4 (94.0)          |
| Redundancy                          | 7.8 (8.0)            | 4.3 (4.4)            |
| <b>Refinement</b>                   |                      |                      |
| Resolution (Å)                      | 50.0 – 2.5           | 50 – 3.0             |
| No. reflections                     | 33,330               | 29106                |
| $R_{\text{work}} / R_{\text{free}}$ | 23.9 / 25.9          | 24.4 / 27.4          |
| No. atoms                           |                      |                      |
| Protein/DNA                         | 7,000                | 7,000                |
| Ion                                 | 0                    | 8                    |
| Water                               | 113                  | 20                   |
| Average B-factor (Å <sup>2</sup> )  |                      |                      |
| Protein/DNA                         | 78.4                 | 88.9                 |
| Ion                                 | n/a                  | 123.0                |
| Water                               | 47.7                 | 53.0                 |
| R.m.s. deviations                   |                      |                      |
| Bond lengths (Å)                    | 0.009                | 0.007                |
| Bond angles (°)                     | 1.2                  | 1.2                  |

\*Values in parentheses refer to the highest-resolution shell.

## Supplementary Fig. Legends

### Fig. S1 – DNA bending parameters

As indicated under all three graphs, the DNA substrate contains a 3'-bridging phosphorothiolate between the -1 thymine (red, boxed) and the +1 cytosine. Two complementary strands (bottom) adjoin at a nick (red arrowhead). Blue diamonds indicate where the DNA bends.

**a** Base pair rise. The average rise of B-form DNA (3.2 Å) is indicated by the dotted line.

**b** Base pair roll.

**c** Base pair twist. The average twist of B-form DNA (36°) is indicated by the dotted line. Each panel was made using the output of 3DNA<sup>42</sup>.

### Fig. S2 – Comparison of the topo II active site with classic two-metal enzyme systems

**a** Superposition of the covalent-complex active site (cyan/green/yellow) with ribonuclease H (RNaseH, dark blue) bound to uncleaved RNA<sup>43</sup>. The two magnesium ions seen in RNaseH (blue spheres) straddle the scissile phosphate; one resides close to the metal A position seen in the topo II model (black spheres).

**b** Superposition of the covalent-complex active site (cyan/green/yellow) with the BamHI restriction endonuclease (pink) bound to cleaved DNA products<sup>44</sup>. As with RNaseH, both metal ions (pink spheres) straddle the scissile phosphate; again, one is situated in a position analogous to metal A (black spheres) in the present structure.

### Fig. S3 – Alignment of active site residues for type IA topoisomerases

The presence of a conserved lysine in the type IA topoisomerase active site is highlighted in red. The lysine alternates between two adjacent positions between topo I (TopA) and topo III (TopB) paralogs. The metal A-binding glutamic acid is highlighted in cyan. *E. coli* amino acid numberings are indicated.

### **Fig. S4 – Type IIA topoisomerase gating motions**

**a** Stereo image superposing the winged helix domains for the covalent-complex structure (magenta) on the prior non-covalent structure (cyan)<sup>13</sup>. Movement of the active site tyrosine is enabled by an inward rocking of the WHD.

**b** Alignment of the salt-bridge network that links active site status to C-gate dynamics. Although the alignment initially suggests that two positions are not strictly conserved in some bacterial type IIA topoisomerases (the aspartate in *E. coli* topo IV and one of the two arginines in *M. tuberculosis* gyrase), inspection of structural models available for these outliers shows that the salt bridge connection is actually maintained by compensatory mutations in nearby residues (shaded letters, see also panel c).

**c** The salt-bridge networks in *E. coli* topo IV (ParC, *left*, salmon) and *M. tuberculosis* gyrase (GyrA, *right*, pale green). Compare to Fig. 4b in the text.

**d** Comparison of DNA-gate transitions in the principal DNA binding (“A”) region of type IIA topoisomerases. (*Left*) DNA-gate “closed.” The present topo II cleavage complex is shown in cyan, with the TOPRIM domains removed for clarity. (*Right*) DNA-gate “open.” An apo structure of yeast topo II (PDB ID 1BGW)<sup>27</sup> is shown with the TOPRIM domains removed for clarity. In both instances, the C-gate interface is closed, and constitutes the primary means through which the protein dimerizes.

### **Fig. S5 – Model for the relative timing of gate opening and closing during the type II topoisomerase reaction**

In all panels, a green circle denotes a cleaved G-segment or open C-gate, while a red octagon denotes a locked (closed) gate. Three dissociable interfaces – the N-gate (upper yellow domains), DNA-gate (middle blue/cyan region with purple cylinder) and C-gate (lower blue “tips”) – control G-segment cleavage and T-segment transport in response to ATP binding and hydrolysis. Although the exact timing of gate opening and closure has not been determined experimentally, available structural information shows that the C-gate can spontaneously open upon G-segment

binding, even when no T-segment is present<sup>13</sup>. By contrast, the status of the C-gate appears closed when: 1) the enzyme is not bound to DNA and the DNA gate is shut<sup>28,45</sup>, 2) the enzyme is not bound to DNA and DNA gate is open<sup>27,29,46</sup>, or 3) the enzyme is bound to DNA, but the duplex is cleaved (as seen in the present study and elsewhere<sup>47</sup>.) These observations are consistent with a mechanism in which G-segment binding allosterically destabilizes the C-gate, shifting the status of the interface from a predominantly associated form to one that can open and close with frequency. The likelihood of the C-gate opening would be adjusted (to a more or less favorable event) depending on the state of the topoisomerase reaction.

(1) A G-segment DNA (purple) is bound and bent at the DNA gate. The C-gate is destabilized and now capable of opening, but trends toward a closed state.

(2) ATP binding dimerizes the ATPase domains (the N-gate, yellow) capturing a T-segment (green). The G-segment DNA is cleaved, with the positioning of the active-site tyrosine ensuring that the C-gate is locked shut.

(3) The DNA gate is opened, allowing T-segment passage. The C-gate remains closed.

(4) The DNA-gate closes and configures the active site for G-segment religation.

(5) Religation and loss of the tyrosine-DNA link allosterically frees the C-gate to open, an event that may be favored by the presence of the T-segment resident between the interfaces.

### **Fig. S6 – Modeling of alternate DNA half sites**

**a**  $2F_o - F_c$  maps showing representative electron density ( $1 \sigma$  contour) around positions  $T_{+6}/A$  and  $A/T_{-2}$  base pairs (see Fig. 1b for numbering) highlights the averaged features of the DNA resulting from the operation of the crystallographic dyad.

**b** Same as (a), but showing composite simulated-annealing omit maps at  $1 \sigma$  contour.

## **Supplemental Movie SM1**

The transition between cleaved and uncleaved DNA states permits C-gate opening. The movie begins with the reported structure (3L4J), colored as in Fig. 1c. The structure then morphs into a non-covalent structure with the C-gate open (2RGR)<sup>13</sup>. The catalytic tyrosine is shown in red. Intermediate states used to make the movie were modeled using CNS<sup>48</sup> and software written by the Yale Morph Server<sup>49</sup>. Images were generated using PyMol<sup>39</sup>, and the movie was compiled using Quicktime Pro (Apple).

Fig. S1

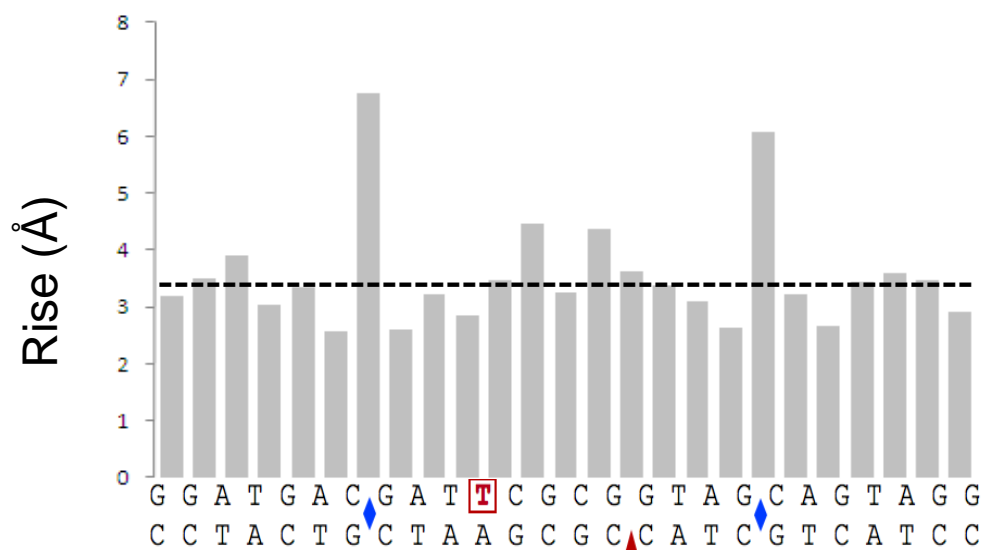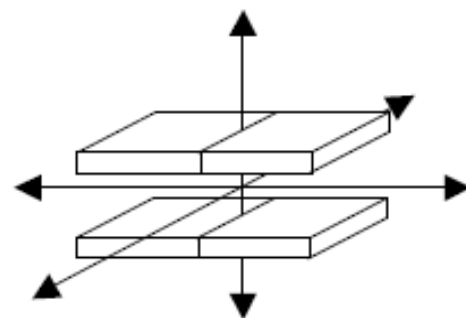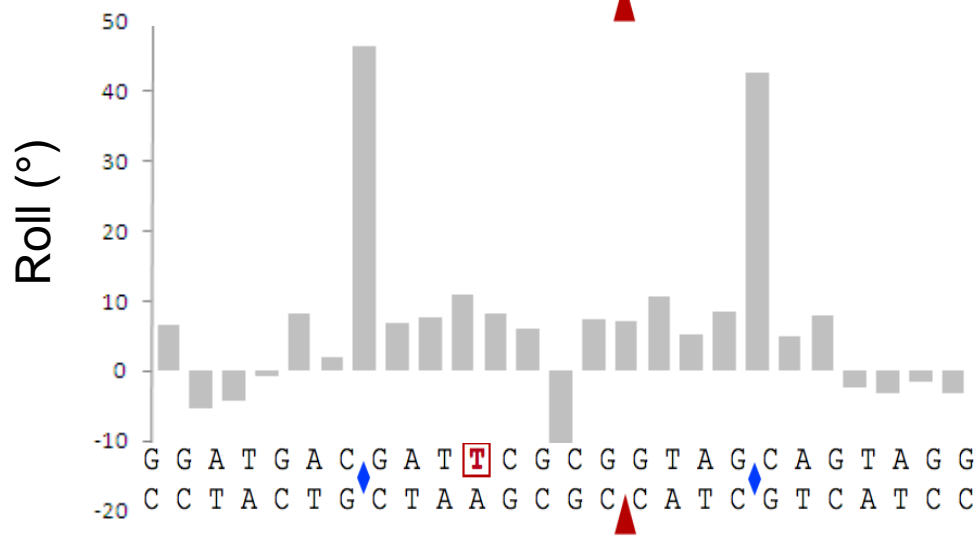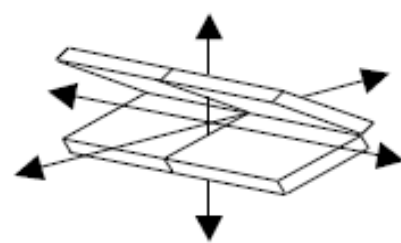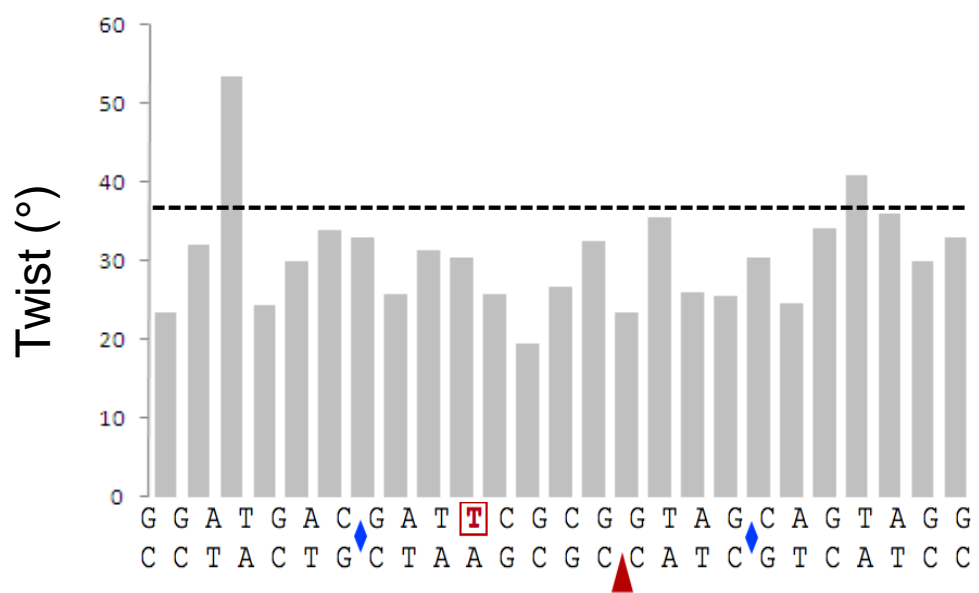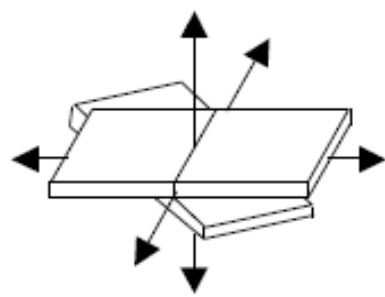

Fig. S2

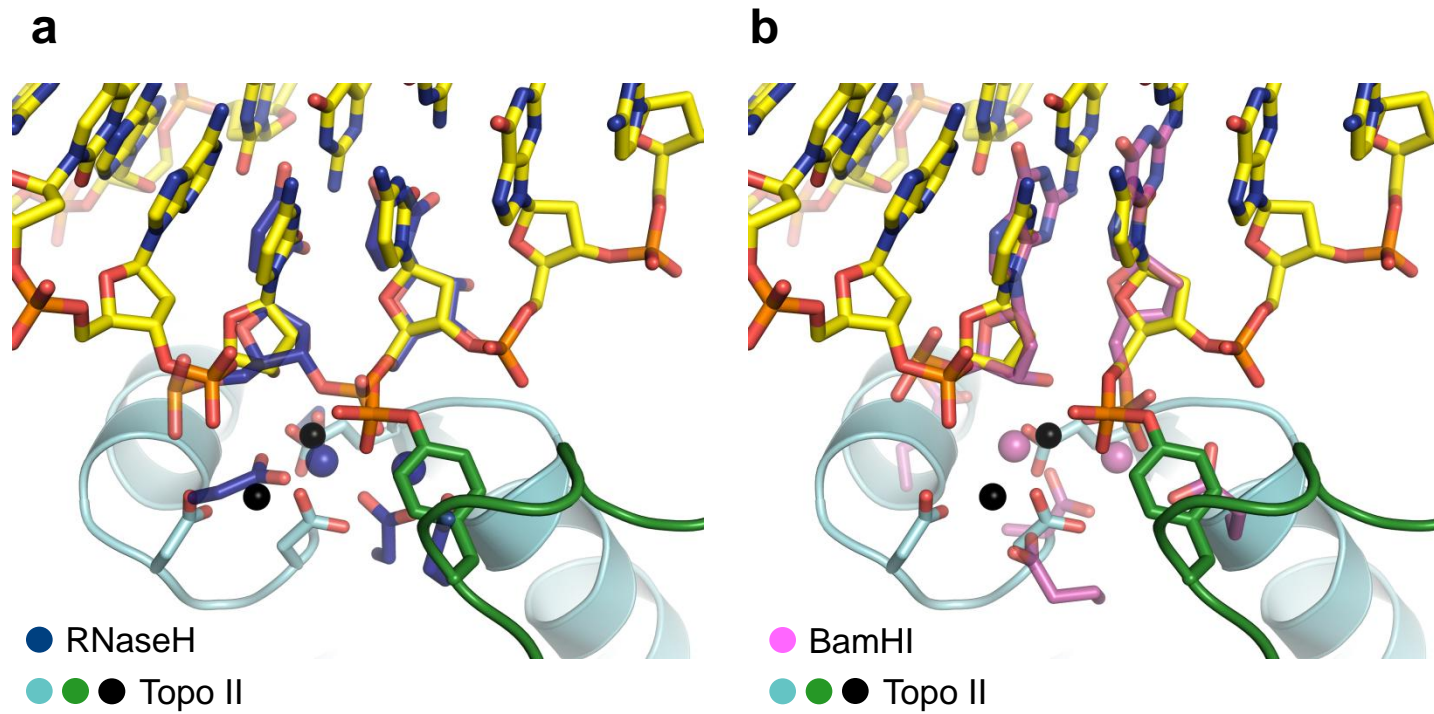

Fig. S3

Topo I

|                      | Glu9    | Lys13            |
|----------------------|---------|------------------|
| <i>E. coli</i>       | KALVIVE | SPAKAKTINKYLGSDY |
| <i>H. influenza</i>  | KSLVIVE | SPAKAKTINKYLGSQY |
| <i>A. aeolicus</i>   | MELFIVE | SPTKAKTIQKFLGKGF |
| <i>T. maritima</i>   | KKYIVVE | SPAKARTIKSILGNEY |
| <i>M. genitalium</i> | KNLVVIE | SPNKVRTLKQYLPSDE |
| <i>S. aureus</i>     | DNLVIVE | SPAKAKTIEKYLGKKY |
| <i>R. prowazekii</i> | MKLVIVE | SPAKAKTINKYLQDEF |

Topo III

|                      |         |                   |
|----------------------|---------|-------------------|
| <i>H. sapiens</i>    | TVLMVAE | EKPSLAQSIAKILSRGS |
| <i>S. cerevisiae</i> | KVLCVAE | EKNSIAKAVSQILGGGR |
| <i>H. influenza</i>  | MRLFIAE | EKPSLARAOADVLPKPH |
| <i>B. subtilis</i>   | KTVVIAE | EKPSVGRDLARVLKCHK |
| <i>S. aureus</i>     | KSLILA  | EKPSVARDIADALQINQ |
| <i>S. typhi</i>      | MRLVLC  | EKPSQGRDIAKFLGATO |
| <i>P. multocida</i>  | MRLFIAE | EKPSLARAIADVLPKPH |
| <i>V. cholerae</i>   | TRLFIAE | EKPSLARAIADALPKPH |
| <i>E. coli</i>       | MRLFIAE | EKPSLARAIADVLPKPH |

Glu7 Lys8



Fig. S4

**a**

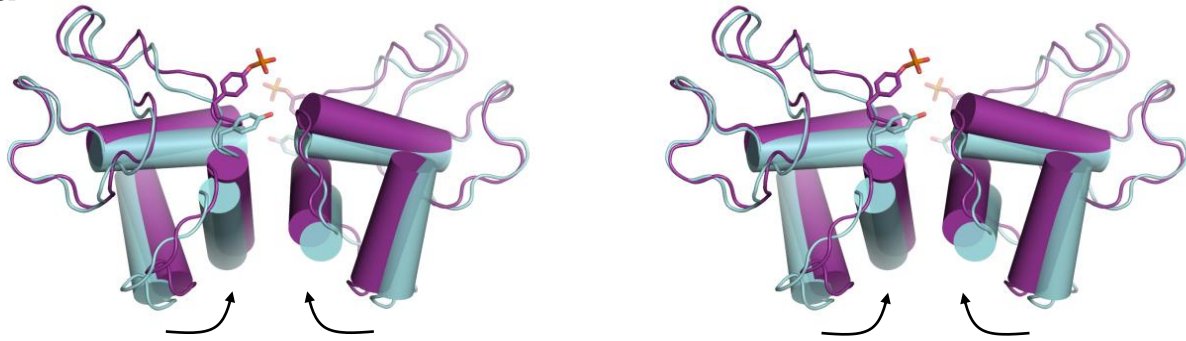

**b**

|               |                      |                                  |
|---------------|----------------------|----------------------------------|
|               |                      | Asp799                           |
| Top2          | <i>S. cerevisiae</i> | TELNKLTRKIFHPAD <b>D</b> DPLYKYI |
| Top2          | <i>S. pombe</i>      | TALSPLARVLFNSN <b>D</b> DQLINYQ  |
| Top2 $\alpha$ | Human                | TMLSSLARLLFPPK <b>D</b> DHTLKFL  |
| Top2          | Mouse                | TMLSPLARLLFPPK <b>D</b> DHTLRFL  |
| Top2          | <i>Drosophila</i>    | TIMSPLTRLIYHPL <b>D</b> DPLLDYQ  |
| Top2          | <i>Arabidopsis</i>   | TKLSPVTRILFPK <b>D</b> DLLLDYL   |
| GyrA/B        | <i>E. coli</i>       | IRLAKIAHELMAD <b>D</b> LEKETVDFV |
| GyrA/B        | <i>A. aeolicus</i>   | AKLSPLAVEMLT <b>D</b> IDKDTVDFQ  |
| GyrA/B        | <i>M. tuberc.</i>    | ARLTPLAMEMLR <b>E</b> IDEETVDFI  |
| ParC/E        | <i>E. coli</i>       | SRLSKYSELLLS <b>E</b> LGQGTADWV  |

|               |                      |                                           |         |
|---------------|----------------------|-------------------------------------------|---------|
|               |                      | Arg1001                                   | Arg1008 |
| Top2          | <i>S. cerevisiae</i> | EFYYV <b>R</b> LEYYQ <b>K</b> RKDHMSERLQ  |         |
| Top2          | <i>S. pombe</i>      | EFYEV <b>R</b> LRTYQ <b>R</b> RKEHVMNELE  |         |
| Top2 $\alpha$ | Human                | DFFEL <b>R</b> LKYYGL <b>R</b> KEWLLGMLG  |         |
| Top2          | Mouse                | DFFEL <b>R</b> LKYYGL <b>R</b> KEWLLGMLG  |         |
| Top2          | <i>Drosophila</i>    | EYYKL <b>R</b> REYYAR <b>R</b> RDFLVGQLT  |         |
| Top2          | <i>Arabidopsis</i>   | EFFDL <b>R</b> FEYYEK <b>R</b> KETVVKNME  |         |
| GyrA/B        | <i>E. coli</i>       | AFVRH <b>R</b> REVVTR <b>R</b> TIFELRKAR  |         |
| GyrA/B        | <i>A. aeolicus</i>   | EFIKH <b>R</b> LEVILR <b>R</b> SKYFLKKVQ  |         |
| GyrA/B        | <i>M. tuberc.</i>    | YYVDHQLDVIVR <b>R</b> TTY <b>R</b> LRKAM  |         |
| ParC/E        | <i>E. coli</i>       | EWLVF <b>R</b> RDTVRR <b>R</b> LNRYRLEKVL |         |

Fig. S4

**c**

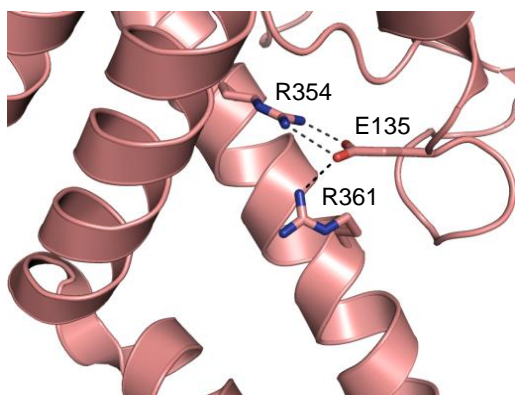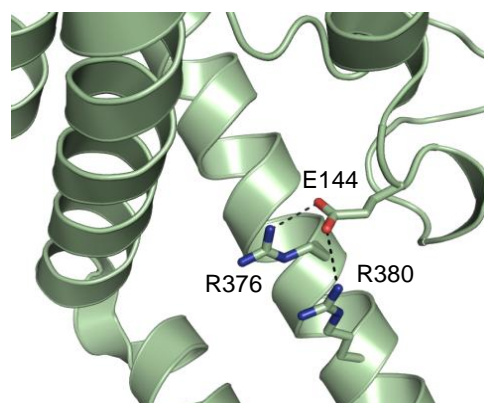

**d**

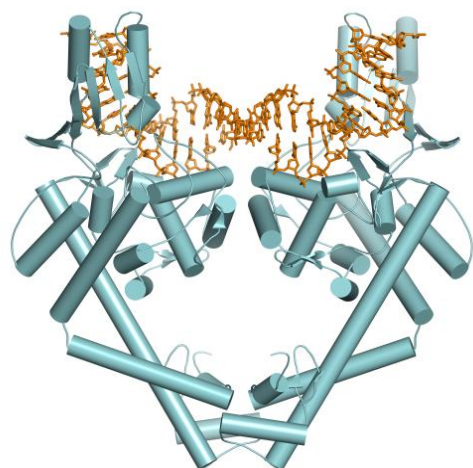

DNA gate

C-gate

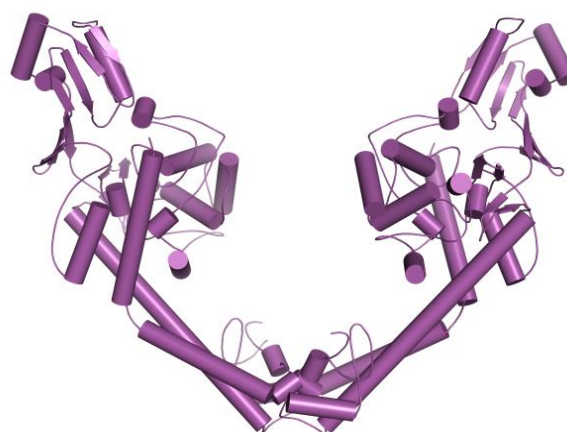

Fig. S5

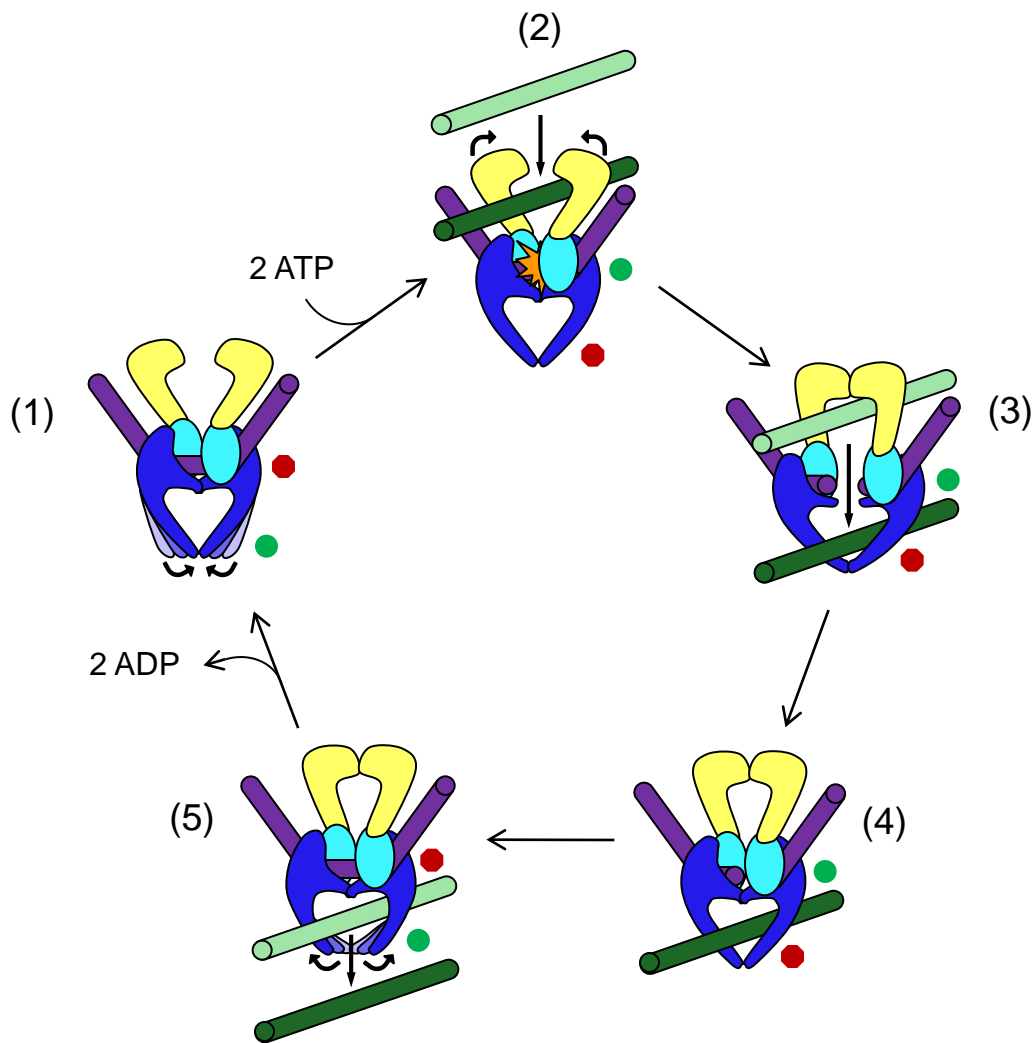

|                 | (1)<br>G-segment<br>binding | (2)<br>G-segment<br>cleavage | (3)<br>T-segment<br>transport | (4)<br>G-segment<br>religation | (5)<br>T-segment<br>release |
|-----------------|-----------------------------|------------------------------|-------------------------------|--------------------------------|-----------------------------|
| <b>DNA gate</b> | Closed                      | Closed                       | Open                          | Closed                         | Closed                      |
| <b>C-gate</b>   | Open →<br>Closed            | Closed                       | Closed                        | Closed →<br>Open               | Open                        |

Fig. S6

**a**

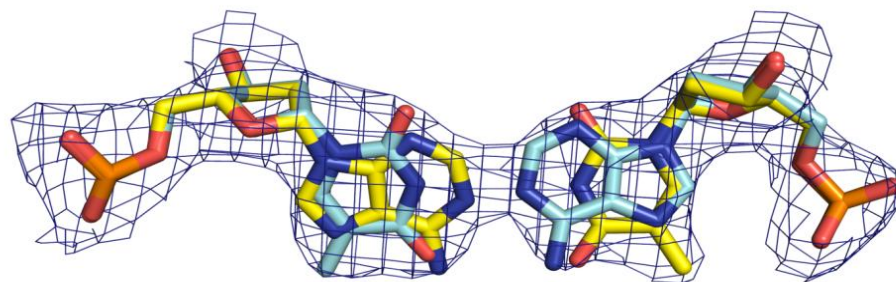

**b**

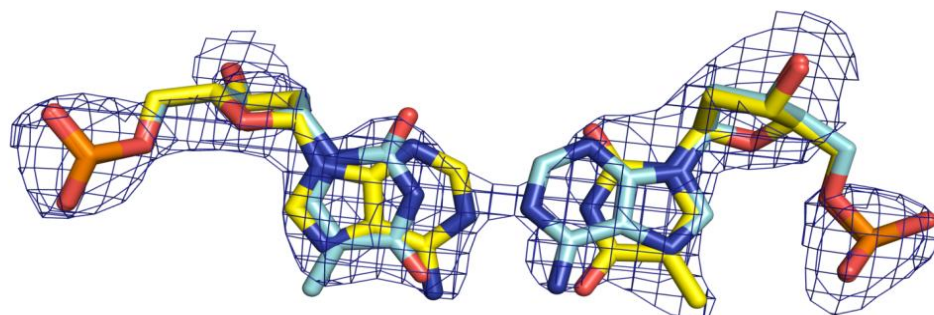

## References

42. Lu, X.J. & Olson, W.K. 3DNA: a versatile, integrated software system for the analysis, rebuilding and visualization of three-dimensional nucleic-acid structures. *Nat Protoc* 3, 1213-27 (2008).
43. Nowotny, M., Gaidamakov, S.A., Crouch, R.J. & Yang, W. Crystal structures of RNase H bound to an RNA/DNA hybrid: substrate specificity and metal-dependent catalysis. *Cell* 121, 1005-16 (2005).
44. Viadiu, H. & Aggarwal, A.K. The role of metals in catalysis by the restriction endonuclease BamHI. *Nat Struct Biol* 5, 910-6 (1998).
45. Tretter, E.M., Schoeffler, A.J., Weisfield, S.R. & Berger, J.M. Crystal structure of the DNA gyrase GyrA N-terminal domain from *Mycobacterium tuberculosis*. *Proteins* 78, 492-5.
46. Corbett, K.D., Schoeffler, A.J., Thomsen, N.D. & Berger, J.M. The structural basis for substrate specificity in DNA topoisomerase IV. *J Mol Biol* 351, 545-61 (2005).
47. Laponogov, I. et al. Structural insight into the quinolone-DNA cleavage complex of type IIA topoisomerases. *Nat Struct Mol Biol* 16, 667-9 (2009).
48. Brunger, A.T. Version 1.2 of the Crystallography and NMR system. *Nat Protoc* 2, 2728-33 (2007).
49. Flores, S. et al. The Database of Macromolecular Motions: new features added at the decade mark. *Nucleic Acids Res* 34, D296-301 (2006).
